# Supplementary material for: Drug Release from Phase-Changeable Nanodroplets Triggered by Low-Intensity Focused Ultrasound
Source: PubMed Central journal article supplement — Theranostics. 2018 Feb 2;8(5):1327–39. doi: 10.7150/thno.21492 (PMC5835939; doi:10.7150/thno.21492), 2018-02-02
Supplement: thnov08p1327s1.pdf [file thnov08p1327s1.pdf]

## Supporting information

### Programmable Drug Release from Phase-Changeable Nanodroplets Triggered by Low-Intensity Focused Ultrasound

Yang Cao,<sup>1</sup> Yuli Chen,<sup>1</sup> Tao Yu,<sup>1</sup> Yuan Guo,<sup>1</sup> Fengqiu Liu,<sup>1</sup> Yuanzhi Yao,<sup>1</sup> Pan Li,<sup>1</sup> Dong Wang,<sup>1</sup>  
Zhigang Wang,<sup>1</sup> Yu Chen<sup>2\*</sup> and Haitao Ran<sup>1\*</sup>

<sup>1</sup>Chongqing Key Laboratory of Ultrasound Molecular Imaging, Institute of ultrasound imaging,  
Second Affiliated Hospital, Chongqing Medical University, Chongqing, 400010, P. R. China.

<sup>2</sup>State Key Lab of High Performance Ceramics and Superfine Microstructure, Shanghai Institute  
of Ceramics, Chinese Academy of Sciences, Shanghai, 200050, P. R. China.

\*Corresponding author:

Yu Chen: Email: [chenyu@mail.sic.ac.cn](mailto:chenyu@mail.sic.ac.cn);

Haitao Ran: Email: [ranhaitao@hospital.cqmu.edu.cn](mailto:ranhaitao@hospital.cqmu.edu.cn).

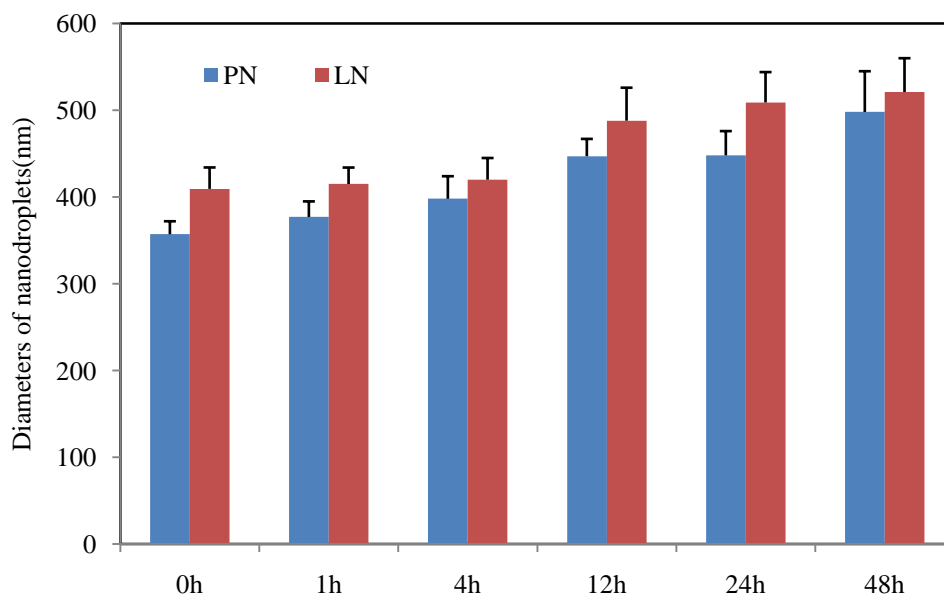

Fig.S1 Diameter of nanodroplets in serum

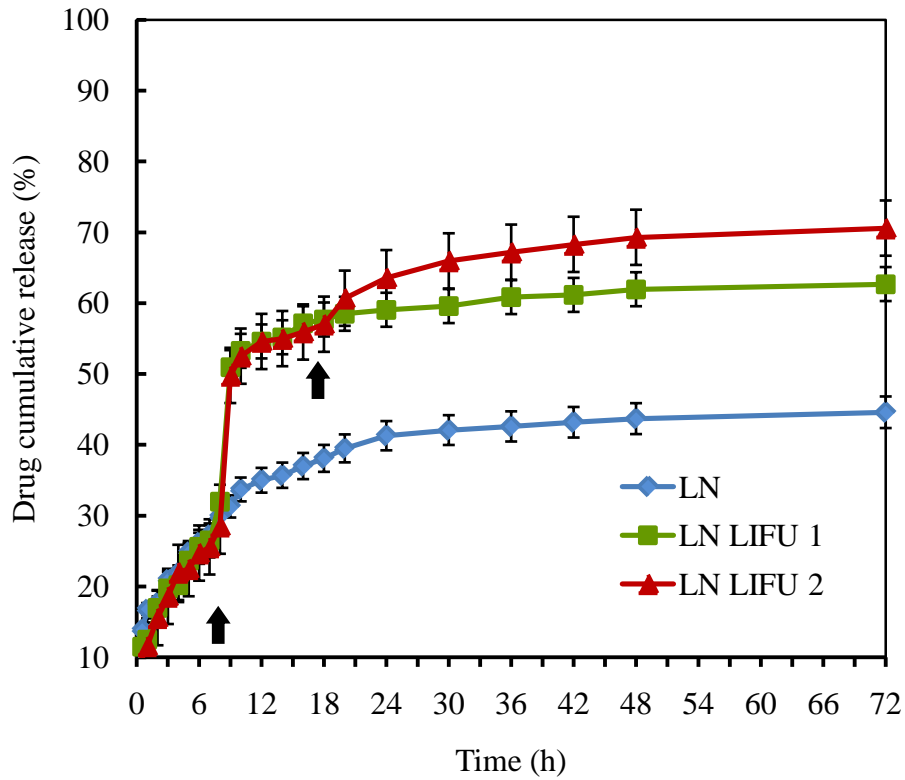

Fig.S2 Drug-releasing profiles from LN at different ultrasound conditions  
(black arrow: ultrasound administration)

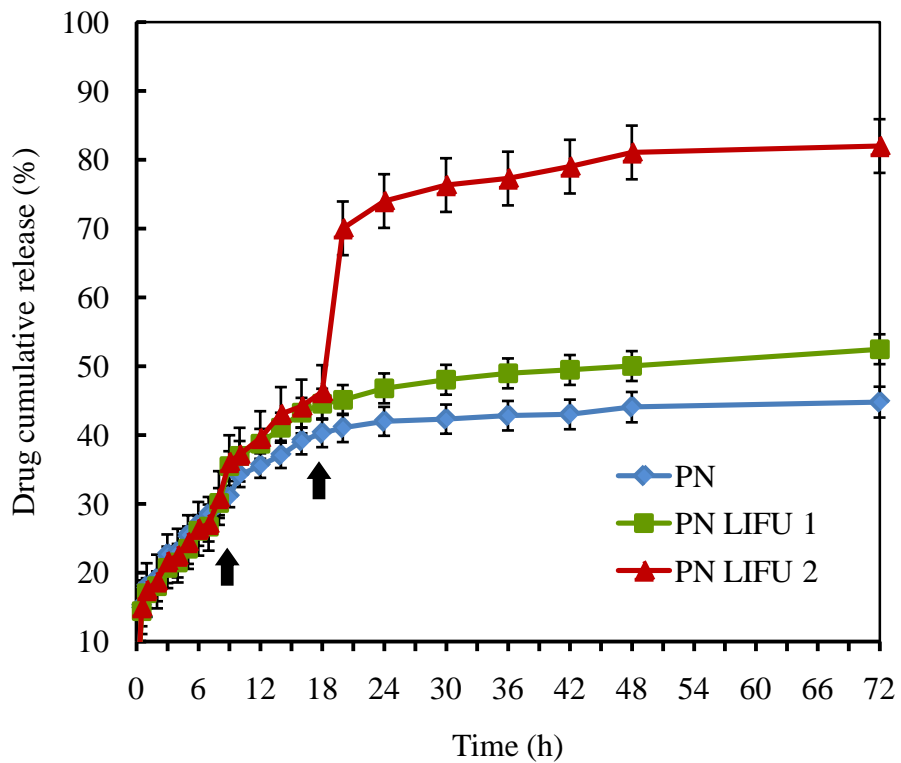

Fig.S3 Drug-releasing profiles from PN at different ultrasound conditions

(black arrow: ultrasound administration)

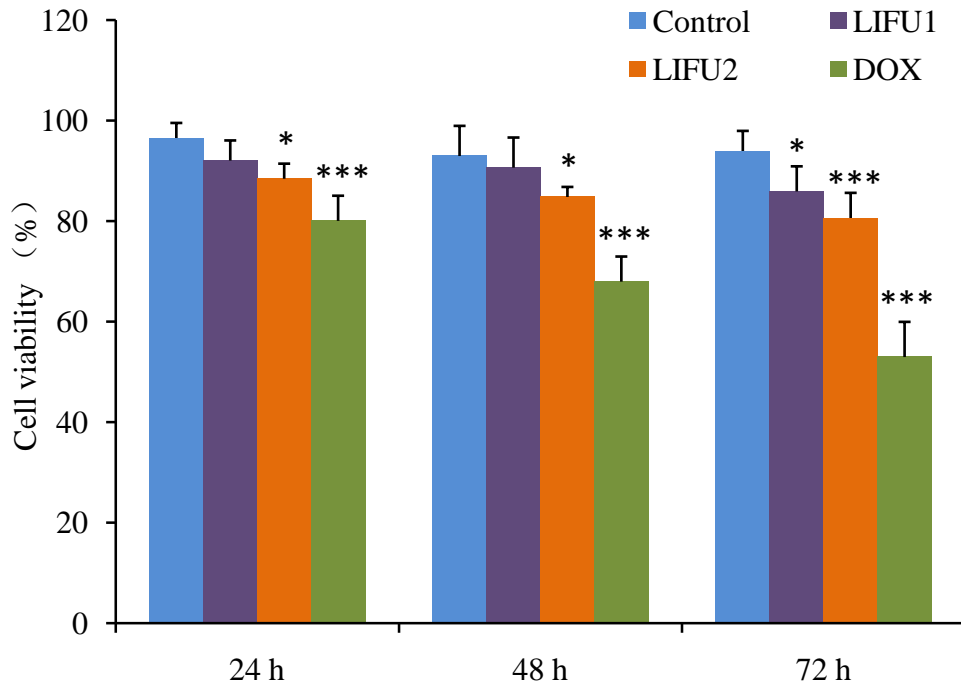

Fig.S4 Cell viability of various ultrasound conditions (\* $p < 0.05$  vs the control group; \*\*\* $p < 0.001$  vs the control group;  $n=3$ ).

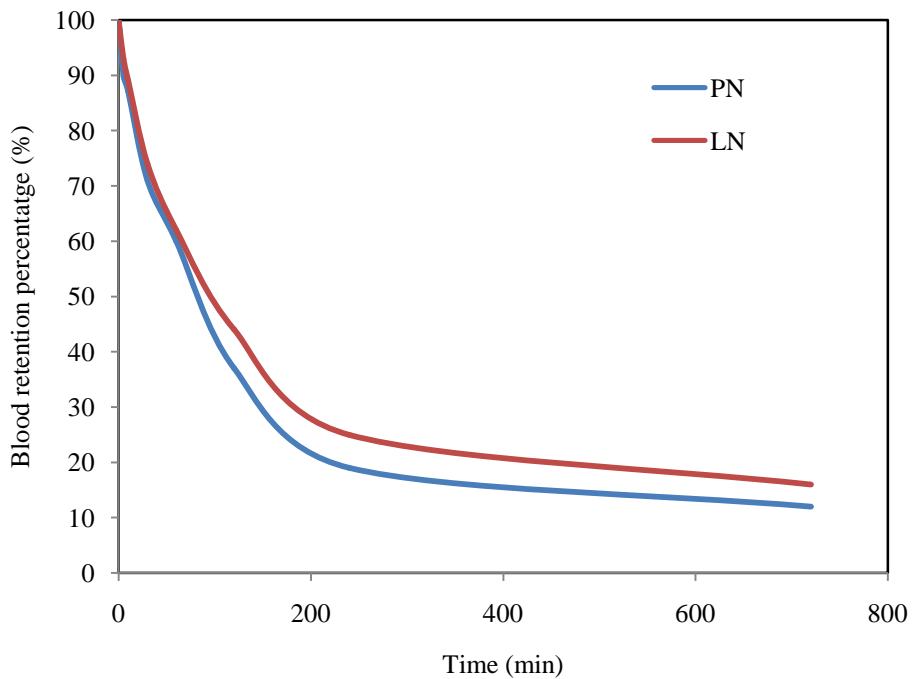

Fig. S5 Blood retention-time profiles of nanodroplets
